# Supplementary material
Source: PubMed Central journal article supplement (PMC6030923)
Supplement: kwx386millerwebmaterialfinal.pdf [file kwx386millerwebmaterialfinal.pdf]

**Web Table 1.** Total number of participants with HbA1c data available at each follow-up examination (Figure 2).

| CVD Incidence<br>Status | Follow-up Time, years |     |     |     |     |     |     |
|-------------------------|-----------------------|-----|-----|-----|-----|-----|-----|
|                         | 0                     | 2   | 4   | 6   | 8   | 10  | 18  |
| Cases                   | 265                   | 181 | 147 | 124 | 88  | 83  | 29  |
| Noncases                | 294                   | 214 | 193 | 167 | 149 | 178 | 146 |

CVD, cardiovascular disease; HbA1c, hemoglobin A<sub>1c</sub>.

**Web Table 2.** Total number of participants with HbA1c data available at each follow-up examination (Figure 3).

| Year of T1D<br>Diagnosis | Follow-up Time, years |     |     |     |     |     |     |
|--------------------------|-----------------------|-----|-----|-----|-----|-----|-----|
|                          | 0                     | 2   | 4   | 6   | 8   | 10  | 18  |
| 1950–1964                | 169                   | 113 | 87  | 73  | 52  | 54  | 28  |
| 1965–1980                | 390                   | 282 | 253 | 218 | 185 | 207 | 147 |

HbA1c, hemoglobin A<sub>1c</sub>; T1D, type 1 diabetes.
